# Supplementary material
Source: ML conference proceedings conference paper supplement (https://openreview.net/forum?id=7d9mumQ4ur)
Supplement: supplementary_material [file workshop__DexGarmentLab_Supp.pdf › dexgarmentlab_workshop_supp/workshop__DexGarmentLab_Supp.pdf]

# Supplementary Material Overview for DexGarmentLab

## I Explanation about Automated Data Collection

Explanation about Garment Affordance Model (GAM) and automated data collection pipeline.

## II Experiments

Experiments for simulation / real-world environment setup and HALO evaluation.

## III Details about Key Parameters in PBD for Improved Realism

Comprehensive explanation about how the parameters—*adhesion*, *friction*, *particle-adhesion-scale*, *particle-friction-scale*—contribute to improving the realism of garment in the simulation environment.

## IV LeapMotion for Teleoperation

Detailed overview of the LeapMotion workflow and its operational performance.

## V Advantages of Dexterous Hands over Parallel Grippers

Detailed explanation on advantages of dexterous hands over parallel grippers.

## VI Recorded Information in Automated Data Collection

Comprehensive introduction to the various types of environmental information collected in the simulation during the automated data collection phase, along with the techniques employed for efficient data acquisition.

## VII Real-World Experiment Scene

Schematic Diagram of the Real-World Experimental Setup.

## VIII Comparison with Teleoperation Data

Detailed comparison between autonomously collected data and teleoperation data to demonstrate the efficiency and high quality of automated data collection pipeline.

## IX Additional Baseline Comparison

Additional baseline comparison for demonstrating the excellent performance of HALO.

## X Sim2Real Transfer

Explanation on sim2real transfer situation about HALO.

## XI Training Details of Main Algorithm

Training details for the GAM and SADP algorithms, including hyperparameter settings, computational resources, and other relevant specifications.

## XII Limitation

The limitation of our work, including simulation-method limitation, task limitation, data-collection limitation.

## XIII DexGarmentLab Assets

A detailed description of the various assets used in DexGarmentLab, including garment assets, environment-interaction assets, robots assets, and material assets.

## XIV Detailed Task Description

A detailed description of all garment manipulation tasks involved in DexGarmentLab, including task environment initialization and randomization, task sequence, task success metrics, and garment assets used for each task.

## XV Broader Impact

The potential societal impacts of our work.

## I. EXPLANATION ABOUT AUTOMATED DATA COLLECTION

### A. Garment Affordance Model (GAM)

Built upon the UniGarmentManip [7] framework, GAM leverages structural and correspondence consistency across category-level garments, enabling the identification of target grasp points on category-level novel garments. For training process, as shown in Main Paper Fig.2 (Red Part), we employ a **Skeleton Merger** [6] network architecture to obtain the skeleton point correspondences between flat garments while adopting the point tracing method in simulation to establish correspondences between the flat garment and its deformed version. Using InfoNCE [3] loss function, we train PointNet++ [4] to pull features of positive corresponding point correspondences closer while pushing apart negative corresponding pairs, which enhances dense visual correspondence by enabling alignment across different garments in various states. Please refer [7] for more details.

It's worth mentioning that, to enable GAM to handle point clouds with translation and scale invariance, we pre-normalize the input demo/operated point cloud into a canonical space. This ensures that GAM maintains generalization ability when faced with garments undergoing different translations and scales. As for the issue of rotational invariance, we consider it as the garment's deformation state. By generating sufficient samples with varying rotations, we enable GAM to effectively learn the correspondences of garments under different rotations.

For inference process, as shown in Main Paper Fig.2 (Green Part), with pretrained GAM, given one demo garment point cloud  $O$ , demo grasp points  $(p_1, p_2, \dots)$  and one operated garment point cloud  $O'$ , we can obtain the demo grasp points features  $(f_{p_1}, f_{p_2}, \dots)$  and operated garment observation features. By dotting demonstration grasp points features and operated garment observation features to get similarities and selecting features with biggest similarity scores, we can get corresponding grasp points  $(p'_1, p'_2, \dots)$  on  $O'$ .

### B. Automated Data Collection Pipeline

Here we give a detailed description about our automated data collection pipeline shown in Main Paper Fig.2.

Firstly, We obtain demo grasp points, demo task sequences, and demo hand grasp poses from a single expert demonstration. In our actual operation process, while grasp points and task sequences are manually defined, hand poses are generated using the *LeapMotion* solution (see Appendix IV).

Once target grasp points are identified on the operated garment using GAM, with demo task sequences, we control the robotic arms via inverse kinematics (IK) to execute sequential operations while controlling dexterous hands using PD controller based on the joint positions from demo hand grasp poses. It is important to note that the task trajectories are not fixed but are adapted based on the garment's shape and length. For example, in *garment-self-interaction tasks*,

such as folding, the lifting height is adjusted according to the sleeves and overall garment length to ensure proper folding. In *garment-environment-interaction tasks*, such as hanging, both the lifting height and placement position are adapted to align the garment's center with the hanger, preventing slippage. These adjustments reflect common and reasonable actions in real-world scenarios, and introducing such variations increases the task difficulty. The details about tasks can be found in Appendix XIV.

During task execution, we can simultaneously record various information (such as images, point clouds, robot joint states, etc.) within the simulation environment. These serve as expert demonstration data for subsequent offline training of the policy. Details about recorded information can be found in Appendix VI.

## II. EXPERIMENTS

### A. Environment Setup

**Tasks and Environments.** We evaluate our method on 14 garment manipulation tasks with varying deformation characteristics. Detailed environment specifications including scene randomization parameters, success metrics, and train/test configurations are provided in the Appendix XIV.

**Demonstration Collection.** Using our automated data collection pipeline, we acquired 100 demonstrations per task, with 30-100 environment steps in each demonstration. The time required to collect a demonstration varies between approximately 30-80 seconds depending on the task, which is significantly faster than data collection through teleoperation. We make comparison between autonomously collected data and teleoperation data in Appendix VIII

**Baselines.** We compare against two state-of-the-art diffusion-based approaches: 1) **Diffusion Policy (DP)** [1], which utilizes images as observations to generate actions via diffusion. 2) **3D Diffusion Policy (DP3)** [8], which replaces image inputs in the Diffusion Policy with point clouds.

**Ablations.** To analyze components, we evaluate two ablated variants: 1) **w/o GAM**: Excludes the Garment Affordance Model (GAM), using SADP for trajectory execution. 2) **w/o SADP**: Removes Structure-Aware Diffusion Policy (SADP), using GAM + DP3 for trajectory execution.

**Metrics.** Each task is evaluated over 50 episodes with three different seeds. We report success rates as  $Mean \pm Std$  across all trials.

### B. Results Analysis

Tab. I (Row 1, 2, 5) quantifies **HALO**'s performance against baseline methods in simulation. Our method achieves superior success rates across dexterous garment manipulation tasks, demonstrating statistically significant improvements over existing approaches. We also provide more baselines comparison in Appendix IX.

Our ablation study (Tab. I, Row 3, 4, 5) quantifies the impact of ablating two core components in **HALO**: the Garment Affordance Model (GAM) and the Structure-Aware Diffusion Policy (SADP). Fig. 1 provides visual evidence of these effects.

TABLE I: **Quantitative Results in Simulation.** HALO outperforms baselines and ablations.

| Method        | Fling                             |                                   |                                   | Fold                              |                                   |                                   | Hang                              |                                   |                                   |                                   | Wear                              |                                   |                                   | Store                             |
|---------------|-----------------------------------|-----------------------------------|-----------------------------------|-----------------------------------|-----------------------------------|-----------------------------------|-----------------------------------|-----------------------------------|-----------------------------------|-----------------------------------|-----------------------------------|-----------------------------------|-----------------------------------|-----------------------------------|
|               | Dress                             | Tops                              | Trousers                          | Dress                             | Tops                              | Trousers                          | Dress                             | Tops                              | Trousers                          | Coat                              | Baseball Cap                      | Bowlhat                           | Scarf                             | Tops                              |
| DP            | 0.59 $\pm$ 0.05                   | 0.55 $\pm$ 0.05                   | 0.54 $\pm$ 0.15                   | 0.55 $\pm$ 0.03                   | 0.53 $\pm$ 0.05                   | 0.47 $\pm$ 0.04                   | 0.51 $\pm$ 0.03                   | 0.45 $\pm$ 0.01                   | 0.56 $\pm$ 0.09                   | 0.52 $\pm$ 0.04                   | 0.65 $\pm$ 0.03                   | 0.41 $\pm$ 0.05                   | 0.67 $\pm$ 0.07                   | 0.65 $\pm$ 0.02                   |
| DP3           | 0.51 $\pm$ 0.03                   | 0.54 $\pm$ 0.03                   | 0.58 $\pm$ 0.10                   | 0.47 $\pm$ 0.08                   | 0.52 $\pm$ 0.06                   | 0.54 $\pm$ 0.07                   | 0.51 $\pm$ 0.03                   | 0.53 $\pm$ 0.09                   | 0.59 $\pm$ 0.08                   | 0.58 $\pm$ 0.04                   | 0.61 $\pm$ 0.02                   | 0.55 $\pm$ 0.04                   | 0.60 $\pm$ 0.01                   | 0.63 $\pm$ 0.08                   |
| Ours w/o GAM  | 0.66 $\pm$ 0.02                   | 0.68 $\pm$ 0.06                   | 0.71 $\pm$ 0.08                   | 0.61 $\pm$ 0.04                   | 0.65 $\pm$ 0.02                   | 0.62 $\pm$ 0.10                   | 0.71 $\pm$ 0.03                   | 0.64 $\pm$ 0.02                   | 0.75 $\pm$ 0.07                   | 0.62 $\pm$ 0.01                   | 0.64 $\pm$ 0.02                   | 0.62 $\pm$ 0.03                   | 0.66 $\pm$ 0.02                   | 0.70 $\pm$ 0.01                   |
| Ours w/o SADP | 0.68 $\pm$ 0.09                   | 0.67 $\pm$ 0.07                   | 0.68 $\pm$ 0.09                   | 0.55 $\pm$ 0.08                   | 0.53 $\pm$ 0.09                   | 0.63 $\pm$ 0.08                   | 0.69 $\pm$ 0.10                   | 0.70 $\pm$ 0.08                   | 0.68 $\pm$ 0.06                   | 0.71 $\pm$ 0.03                   | 0.70 $\pm$ 0.01                   | 0.64 $\pm$ 0.02                   | 0.64 $\pm$ 0.05                   | 0.58 $\pm$ 0.07                   |
| Ours (HALO)   | <b>0.82 <math>\pm</math> 0.06</b> | <b>0.85 <math>\pm</math> 0.05</b> | <b>0.83 <math>\pm</math> 0.02</b> | <b>0.76 <math>\pm</math> 0.02</b> | <b>0.81 <math>\pm</math> 0.03</b> | <b>0.77 <math>\pm</math> 0.02</b> | <b>0.88 <math>\pm</math> 0.05</b> | <b>0.92 <math>\pm</math> 0.04</b> | <b>0.91 <math>\pm</math> 0.02</b> | <b>0.90 <math>\pm</math> 0.01</b> | <b>0.79 <math>\pm</math> 0.03</b> | <b>0.72 <math>\pm</math> 0.04</b> | <b>0.88 <math>\pm</math> 0.01</b> | <b>0.80 <math>\pm</math> 0.02</b> |

TABLE II: **Real-World Evaluation** on different tasks.

| Task       | Fold Tops      | Hang Tops      | Wear Scarf     | Wear Hat       |
|------------|----------------|----------------|----------------|----------------|
| DP         | 9 / 15         | 10 / 15        | 6 / 15         | 10 / 15        |
| DP3        | 8 / 15         | 8 / 15         | 7 / 15         | 9 / 15         |
| Ours(HALO) | <b>13 / 15</b> | <b>13 / 15</b> | <b>11 / 15</b> | <b>14 / 15</b> |

Through Tab. I, we find that the performance of HALO markedly decreases when **GAM** is excluded. The integration of GAM leverages dense visual correspondence, thereby enhancing the model’s performance to locate precise manipulation area (shown in Fig. 1), particularly for tasks with significant variability in garment shapes and deformations.

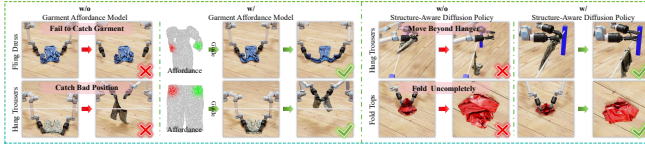

Fig. 1: **Effects brought by GAM / SADP.** Left: Without GAM, robots fail to catch the right manipulation points. Right: Without SADP, robots fail to adjust the trajectories based on garment shapes and structures.

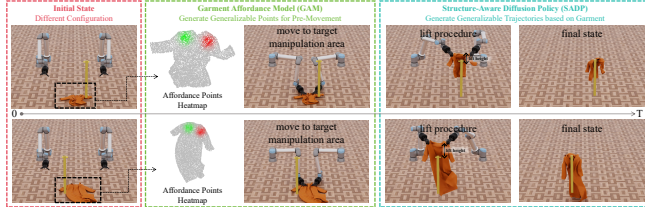

Fig. 2: **HALO’s whole procedure.** Using ‘‘Hang Coat’’ as an example. GAM first infers target manipulation points for robot’s movement, enabling generalization across different garments. Then, SADP generates trajectories based on the garment and scene configurations. Despite variations in garment shape, length, and pothook positions across scenes, SADP adapts accordingly, moving to accurate positions and lifting coats to appropriate heights to successfully hang them on the pothook.

Moreover, **SADP** substantially boosts the performance of HALO. When the model encounters garments that differ considerably from those in the training set, **SADP** can assist in **adjusting** the trajectories according to the garments’ own shapes and structures, thereby better accomplishing the tasks. For instance, as shown in Fig. 1, in the ‘‘Hang Trousers’’ task, the shape of the trousers determines the appropriate hanging height and forward-moving distance; the HALO can adjust its trajectory to complete the task. In the ‘‘Fold Tops’’ task, the HALO can adjust the folding position according to the garment structure, making the folds neater.

**HALO** enables precise manipulation point inference and generates robust policies for diverse garment and scene configurations. Figure 2 further illustrates this.

### C. Real-World Experiments

**Setup.** Our setup comprises two RealMan RM75-6F (Arms) with Psibot G0-R (Dexterous Hands) and a RealSense D435 camera (As shown in Appendix VII). We use Segment-Anything-2 [5] to segment the garment and interaction object from the scene and obtain corresponding point clouds.

**Evaluation.** We evaluate our proposed method on 4 tasks: Fold Tops, Hang Tops, Wear Scarf, and Wear Hat. For each task, we have 3 distinct garments per category, each with 5 initial deformations. Shown in Tab. II, our method outperforms all baselines. Fig. 3 demonstrates the excellent performance of our proposed method.

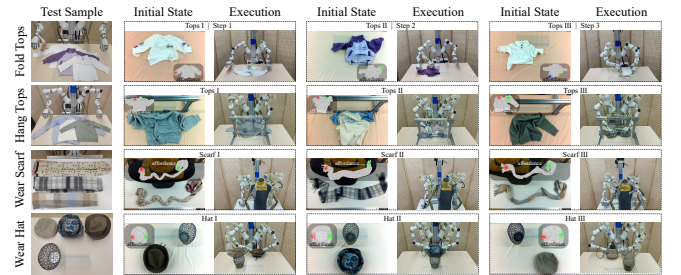

Fig. 3: **Real-World Experiments.** We select Fold\_Tops (Garment-Self-Interaction), Hang\_Tops, Wear\_Scarf, Wear\_Hat (Garment-Environment-Interaction) as typical tasks for illustration. The test samples have different shapes, length, deformations while position of garments and interaction objects are variable. Despite this, GAM of HALO ensures accurate manipulation area location for grasp while SADP of HALO ensures adaptive trajectories base on garment and interaction object.

### III. DETAILS ABOUT KEY PARAMETERS IN PBD FOR IMPROVED REALISM

Position-Based Dynamics (PBD) is a widely adopted method for simulating deformable objects such as garment. It operates by enforcing geometric constraints directly on particle positions, offering both numerical stability and computational efficiency. In this section, we elaborate on several key parameters — *adhesion*, *friction*, *particle-adhesion-scale*, and *particle-friction-scale* — which significantly influence the realism and stability of garment-object interactions, particularly in dexterous manipulation scenarios.

#### A. Adhesion

Adhesion introduces artificial attractive forces between particles or between particles and surfaces (e.g., a robotic hand). It is used to simulate surface stickiness, enabling persistent contact during manipulation. Although adhesion is not a physical force in classical mechanics, it can be heuristically modeled as:

$$\mathbf{f}_{\text{adh}} = -k_{\text{adh}} \cdot (\mathbf{x}_i - \mathbf{x}_j), \quad \text{if } \|\mathbf{x}_i - \mathbf{x}_j\| < r_{\text{adh}}, \quad (1)$$

where  $\mathbf{x}_i$  and  $\mathbf{x}_j$  are the positions of two particles (or a particle and a surface proxy),  $k_{\text{adh}}$  is the adhesion coefficient, and  $r_{\text{adh}}$  is the adhesion radius threshold.

**Effect:** Adhesion enables garments to maintain contact with the fingers of a dexterous hand without requiring continuous high-pressure gripping, facilitating reliable grasping and lifting.

### B. Friction

Friction resists relative tangential motion and is critical for grasp stability. The classical Coulomb friction model is expressed as:

$$\mathbf{f}_{\text{fric}} = -\mu \cdot \|\mathbf{f}_n\| \cdot \frac{\mathbf{v}_t}{\|\mathbf{v}_t\|}, \quad (2)$$

where  $\mu$  is the friction coefficient,  $\mathbf{f}_n$  is the contact normal force, and  $\mathbf{v}_t$  is the tangential relative velocity. In PBD, friction is often approximated as a positional correction that opposes sliding during constraint projection steps.

**Effect:** Friction allows garment to resist sliding off hand surfaces, enhancing control during manipulation.

### C. Particle-Adhesion-Scale

This parameter scales the adhesion forces between internal garment particles. It helps prevent excessive separation or instability during self-collisions or folding. High values increase inter-particle attraction, leading to more cohesive motion.

**Effect:** Particle-adhesion-scale improves garment stability by preventing explosive separations or chaotic folding, especially when complex self-contact occurs.

### D. Particle-Friction-Scale

Particle-friction-scale controls the internal friction between garment particles during relative motion. It is applied during internal constraint solving (e.g., stretch, shear, or collision resolution) and acts as a damping mechanism:

**Effect:** This parameter suppresses excessive internal sliding, preserving folds and wrinkles, and enabling more physically plausible draping and manipulation behaviors.

### E. Summary

Together, these parameters significantly enhance the realism of garment manipulation in simulation. Benefiting from adhesion and friction, dexterous hands can grasp and lift garments based on contact forces. Meanwhile, the particle-adhesion and friction scales stabilize internal garment dynamics, reducing self-collision artifacts and preserving structural coherence.

## IV. LEAPMOTION FOR TELEOPERATION

We employ the *Leap Motion Controller* as a teleoperation device to control the Shadow Hand and generate task-specific hand poses, thereby facilitating the automated data collection pipeline. The Leap Motion Controller is a compact USB device designed for desktop use. It leverages two 640×240-pixel near-infrared cameras to capture hand motion within a roughly hemispherical interaction volume extending up to approximately 60 cm, typically operating at 120 Hz. Its internal algorithms process the raw spatial data to extract 27 distinct hand features, including the palm normal vector, hand direction, wrist position, and 24 finger joint positions.

Here we just utilize the 24 finger joint positions to control Shadow Hand's movement. The teleoperation system and visualization performance are shown in Fig 4.

We have provided relevant tutorial about how to use LeapMotion in our released code. We also explain details on how LeapMotion generates grasping poses below.

For single specific task category (e.g., Hang Coat), the hand poses required to perform specific actions in specific regions, can generally be treated as consistent. Moreover, the deformable nature of garments allows them to adapt naturally to the dexterous hand's pose during manipulation. Therefore, for each specific task, we first define a set of task-specific hand poses (the number depends on the task; for example, Hang Coat requires both a closed grasping pose for the collar and an open pose for release). These poses are generated via teleoperation using LeapMotion, with physical feasibility considered during generation. In this way, the pose definition process inherently includes a manual filtering step to select the most suitable poses.

These task-specific hand poses are then transferred directly into the data collection process for that task category. That is, during data collection across different garments within the same task, the same predefined hand poses are reused.

## V. ADVANTAGES OF DEXTEROUS HANDS OVER PARALLEL GRIPPERS

Due to current restrictions in simulation technology, certain complex tasks cannot yet be effectively implemented in simulated environments. However, across the existing tasks, dexterous hands still demonstrate clear advantages over parallel grippers in several aspects.

1. Our experimental results, particularly those real-world results, reveal significant limitations in two-finger grippers when handling thin or flat regions of garments. In such cases, **the gripper frequently fails to achieve a stable grasp, with garments either slipping during manipulation or not being grasped at all.** Many existing demonstrations involve garment folding with two-finger grippers rely on grasping the garment's boundary, but these strategies also often leads to repeated failed attempts. In contrast, our system employing a five-finger dexterous hand demonstrates clear advantages. **Owing to the hand's larger operation range, greater surface contact, and coordinated multi-finger control, it can stably grasp various regions of a garment—not just its edges—and maintain a firm hold throughout**



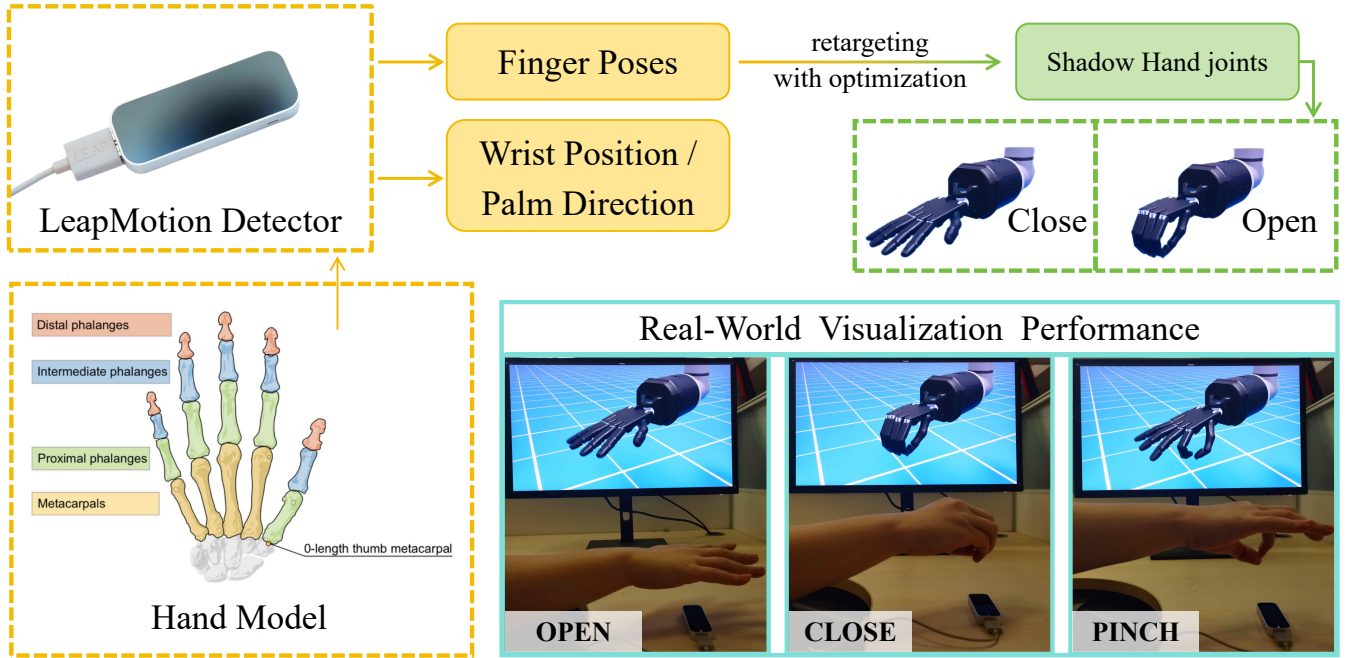

Fig. 4: LeapMotion Workflow and Real-World Visualization Performance.

**the manipulation process.** This capability greatly enhances the flexibility and robustness of robotic garment handling, freeing the system from constraints on graspable areas or predefined strategies.

2. Furthermore, **the diverse hand postures offered by the dexterous hand allow us to tailor the manipulation strategy to the specific requirements of each task.**

- to accomplish a fine-grained task such as putting on a glove, the hand can adopt a **pinch** posture to precisely grasp the glove edge.
- For stable garment pick-and-place operations, an **open/close** posture can be used to maximize contact and grip.
- When placing folded clothes, a **cradle** posture helps preserve the folded structure.
- To smooth wrinkles, the hand can switch to a **smoothing** pose that maximizes surface coverage.

These example poses are shown in the bottom-left corner of Figure 1 (main paper).

The dexterous hand not only replicates the functionality of two-finger grippers but also enables finer and more robust manipulation of garments.

3. Although current simulation still faces significant challenges in accurately modeling interactions between deformable objects and dexterous hands—limiting its ability to simulate complex tasks—these limitations are expected to be gradually addressed with the continued advancement of computer graphics and robotics technologies. As a result, **the advantages of dexterous hands will become even more prominent in complex tasks such as assistive dressing or knot tying, which require flexible coordination among multiple fingers.** We will continue to extend tasks and optimize the simulation framework based on DexGarmentLab, aiming to support a wider range of more complex dexterous-

hand garment interaction tasks.

## VI. RECORDED INFORMATION IN AUTOMATED DATA COLLECTION

In this section, we provide a detailed overview of the various types of data collected during our automated data collection process. These include:

- **joint\_state:** The joint values of the dual-arm dexterous system, including the left arm and right arm (6 joints each), left hand and right hand (24 joints each). The shape is (60, ).
- **image:** RGB images of the workspace. The shape is (480, 640, 3).
- **env\_point\_cloud:** Point cloud of the workspace with color, downsampled to 2048. The shape is (2048, 6).
- **garment\_point\_cloud:** Point cloud of the garment without color, downsampled to 2048. The shape is (2048, 3).
- **points\_affordance\_feature:** The left / right point affordance feature generated by GAM, which can be seen as similarity score (normalized to [0,1]). The shape is (2048, 2).
- **object\_point\_cloud:** Point cloud of the environment-interaction object without color, downsampled to 2048, only exist in Garment-Environment-Interaction tasks. The shape is (2048, 3).

It is worth noting that during data collection, we record all the aforementioned information **every five time steps**. Empirical validation shows that this approach not only reduces data density and accelerates policy training, but also does not compromise overall performance during validation.

## VII. REAL-WORLD EXPERIMENT SCENE

Our real-world experiment scene comprises RealMan RM75-6F (Arms) with Psibot G0-R (Dexterous Hands), a

TABLE III: Automated Data Collection Time and Success Rate Across All Tasks

| Task Name      | Collection Success Rate | Single Collection Time | Task Name               | Collection Success Rate | Single Collection Time |
|----------------|-------------------------|------------------------|-------------------------|-------------------------|------------------------|
| Fling Dress    | 92.6% (100/108)         | 0 min 56 s             | Hang Trousers           | 99.0% (100/101)         | 0 min 58 s             |
| Fling Tops     | 90.1% (100/111)         | 0 min 55 s             | Store Tops              | 98.0% (100/102)         | 1 min 05 s             |
| Fling Trousers | 90.1% (100/111)         | 0 min 48 s             | Wear Baseball Cap       | 85.5% (100/117)         | 0 min 55 s             |
| Fold Dress     | 84.7% (100/118)         | 1 min 06 s             | Wear Scarf              | 83.3% (100/120)         | 1 min 42 s             |
| Fold Tops      | 82.0% (100/122)         | 1 min 08 s             | Wear Bowl Hat           | 95.2% (100/105)         | 0 min 53 s             |
| Fold Trousers  | 82.6% (100/121)         | 0 min 56 s             | Fold Tops (Real-World)  | 90.9% (50/55)           | 0 min 50 s             |
| Hang Coats     | 92.6% (100/108)         | 0 min 41 s             | Hang Tops (Real-World)  | 96.2% (50/51)           | 0 min 38 s             |
| Hang Dress     | 90.9% (100/110)         | 0 min 48 s             | Wear Scarf (Real-World) | 83.3% (50/60)           | 1 min 15 s             |
| Hang Tops      | 91.7% (100/109)         | 0 min 46 s             | Wear Hat (Real-World)   | 93.8% (50/53)           | 0 min 36 s             |

RealSense D435 camera and a few garments across different categories, which is shown in Fig. 5.

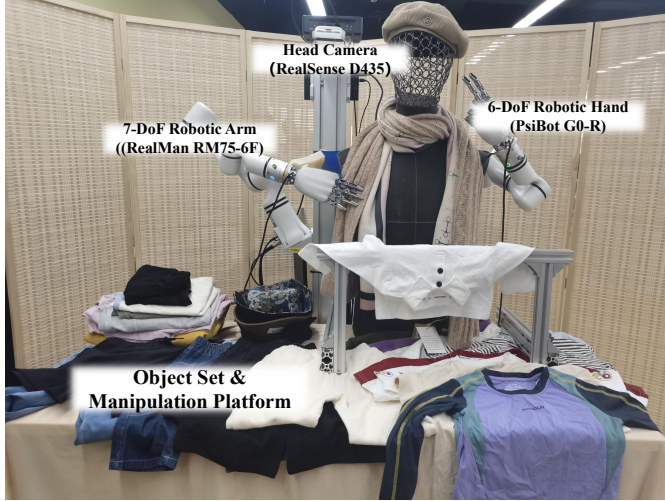

Fig. 5: Real-World Experiment Scene

### VIII. COMPARISON WITH TELEOPERATION DATA

Tab. III presents the data collection time and success rate across all tasks, which validates the effectiveness and efficiency of the automated data collection pipeline. To further verify the quality of data acquired via automation, three representative tasks were selected for data collection, model training, and evaluation, using both teleoperation data and autonomously collected data. Specifically, teleoperation data in simulation was gathered using LeapMotion, while an exoskeleton device was employed for real-world teleoperation data collection. The performance of policies trained on teleoperation data was then compared with that of policies trained on autonomously collected data, with the results summarized in Tab. IV.

TABLE IV: Performance Comparison of HALO with Different Data Sources

| Method (Data Source)             | Hang Tops (Simulation) | Wear Bowlhat (Simulation) | Fold Tops (Real-World) |
|----------------------------------|------------------------|---------------------------|------------------------|
| HALO (Automated Collection Data) | 0.92±0.04              | 0.72±0.04                 | 13 / 15                |
| HALO (Teleoperation Data)        | 0.88±0.03              | 0.70±0.06                 | 13 / 15                |

Experimental results indicate that policies trained on teleoperated and autonomously collected data achieve comparable performance during evaluation. However, from the perspective of human and time cost, teleoperation-based data

collection is significantly more labor-intensive and time-consuming than automated data collection. It is also important to note that our data is not synthetically generated, but collected through real executions in either simulation or the real world, which means the demonstrations are physically realistic. The entire data collection pipeline is enabled by model inference and one-shot demonstrations.

### IX. ADDITIONAL BASELINE COMPARISON

We have additionally included four new baselines for comparison: **ACT (IL)**, **pi0 (VLA)**, **RDT (VLA)**, and **Eureka (RL+VLM)**. We selected representative tasks for evaluation, including **Fling Dress**, **Fold Trousers**, **Hang Coat**, and **Wear Bowlhat** in simulation, as well as **Fold Tops** in real world. The results are shown in Tab. V. The evaluation protocol remains consistent with the original paper:

- For simulation tasks, each task is evaluated over 50 episodes using three different random seeds. We report the success rates as Mean  $\pm$  Std across all trials.
- For real-world task, we evaluate using 3 distinct garments per category, each tested under 5 different initial deformations. We report the success rates as  $\text{successful\_trials} / \text{all\_trials}$ .

TABLE V: Performance Comparison of More Baseline Methods on Typical Tasks

| Method          | Fling Dress (Simulation) | Fold Trousers (Simulation) | Hang Coat (Simulation) | Wear Bowlhat (Simulation) | Fold Tops (Real World) |
|-----------------|--------------------------|----------------------------|------------------------|---------------------------|------------------------|
| DP (IL)         | 0.59±0.05                | 0.47±0.04                  | 0.52±0.04              | 0.41±0.05                 | 9/15                   |
| DP3 (IL)        | 0.51±0.03                | 0.54±0.07                  | 0.58±0.04              | 0.55±0.04                 | 8/15                   |
| ACT (IL)        | 0.35±0.02                | 0.49±0.06                  | 0.43±0.04              | 0.51±0.03                 | 7/15                   |
| pi0 (VLA)       | 0.69±0.01                | 0.52±0.06                  | 0.72±0.01              | 0.59±0.02                 | 10/15                  |
| RDT (VLA)       | 0.60±0.02                | 0.58±0.02                  | 0.62±0.02              | 0.48±0.01                 | 9/15                   |
| Eureka (RL+VLM) | /                        | /                          | 0.16±0.03              | 0.08±0.02                 | /                      |
| HALO (Ours)     | <b>0.82±0.06</b>         | <b>0.77±0.02</b>           | <b>0.90±0.01</b>       | <b>0.72±0.04</b>          | <b>13/15</b>           |

#### Analysis For Imitation-Learning-Based Methods:

We collect 100 demonstrations for each simulation task and collect 50 demonstrations for each real-world task, which are used for policy training (DP/DP3/ACT). A notable limitation of their performance lies in the inability to accurately grasp the target region of the garment, as well as the lack of fine-grained control during placement based on the garment's shape(/state).

#### Analysis for VLA Methods:

We combine all the demonstrations of simulation and real-world tasks to fine-tune pi0 and RDT model. In terms

of final performance, pretrained models such as pi0 and RDT outperform from-scratch approaches like DP, DP3, and ACT. However, compared to HALO, VLA-based models still exhibit clear limitations in accurately perceiving garment shape and state, and in executing precise grasp-and-place actions, resulting in a noticeable performance gap relative to HALO.

#### Analysis for **RL-Based Methods**:

We selected Eureka as the representative RL-VLM-combined method and conducted preliminary experiments on several tasks in simulation. While we observed some initial successful cases on simpler tasks such as Hang Coat and Wear Bowlhat, the overall success rate remained low. Additionally, due to the lack of robust parallelization support in the current Isaac Sim environment and the limited effectiveness of reward functions in handling long-horizon tasks like Fling and Fold, this baseline did not yield valid results across all tasks. Nevertheless, we are actively developing a multi-parallel deformable object manipulation environment based on Isaac Lab, and RL-based approaches for deformable manipulation will be a key focus of our future work.

### X. SIM2REAL TRANSFER

Please note that: the real-world experiments presented in the submitted paper are not the result of a policy-level sim-to-real transfer. As can be observed, the real-world setup differs from the simulation environment.

Actually, there are two ways using HALO for garment manipulation tasks: 1) **transfer the data collection pipeline from simulation to real world, conduct automated data collection and policy training directly in the real world.** 2) **train the policy in the simulation and transfer the policy to the real world.**

In our paper, we adopt **way 1** to demonstrate the effectiveness of HALO. In the Tab. III, we report the efficiency and success rate of real-world data collection, highlighting the strong sim-to-real performance of GAM.

Sim-to-real transfer from the simulation environment remains an important aspect of our study. To this end, **we aligned the settings of both the simulation and real-world environments by using the same hardware setup—Shadow Hand and UR10e—and selected two tasks, Hang Trousers and Wear Hat, for policy-level sim-to-real transfer, which means way 2.** The evaluation criteria follow those used in the previous real-world experiments. It is worth noting that sim-to-real performance is more sensitive to point cloud noise. To address the limited precision of the Realsense D435 in this context, we employed a Kinect camera for more accurate point cloud acquisition.

TABLE VI: Performance Impact of Adding Real-World Data to Simulation Data

| Task Name     | Only Simulation Data | Simulation Data + 15 Real-World Data |
|---------------|----------------------|--------------------------------------|
| Hang Trousers | 8 / 15 (53.3%)       | 13 / 15 (86.7%)                      |
| Wear Hat      | 9 / 15 (60.0%)       | 13 / 15 (86.7%)                      |

Experimental results in Tab. VI show that due to the gap between simulation and the real world, training the

policy solely on simulated data leads to a drop in sim-to-real performance. Incorporating a small amount of real-world data into the training process can effectively enhance the policy’s generalization ability.

### XI. TRAINING DETAILS OF MAIN ALGORITHM

#### A. Garment Affordance Model (GAM)

**Hyper-Parameters Selection.** The training of GAM follows the hyperparameter settings used in the UniGarmentManip framework. we set the number of skeleton pairs to be 50 and batch size to be 32. In each batch, we sample 32 garment pairs. For each garment pair, we sample 20 positive and 150 negative point pairs for each positive point pair. Therefore, in each batch,  $32 \times 32 \times 20$  data will be used to update the model. During the Correspondence training stage, we train the model for 40,000 batches. ‘Coarse-to-fine Refinement’ and ‘Few-shot Adaptation’ mentioned in UniGarmentManip are also adopted for improving GAM’s performance.

**Computational Resource.** we use PyTorch as our Deep Learning framework. Each experiment is conducted on an RTX 4090 GPU, and consumes about 22 GB GPU Memory for training. It takes about 20 hours to train the Coarse Stage, with 1-2 hours of Coarse-to-Fine Refinement and 0.5 hour’s Few-Shot Adaptation.

We trained GAM checkpoints for eight types of garments, including: **Baseball\_Cap, Dress\_LongSleeve, Glove, Scarf, Tops\_FrontOpen, Tops\_LongSleeve, Tops\_NoSleeve, and Trousers.** We release all these checkpoints in our code repo.

#### B. Structure-Aware Diffusion Policy (SADP)

**Hyper-Parameters Selection.** We set the *horizon*, *observation\_steps*, and *action\_steps* to 8, 3, and 4, respectively. The number of denoising steps in the diffusion process is set to 10. The model is trained for a total of 3000 epochs, with validation performed every 25 epochs and checkpoints saved every 100 epochs. We use the AdamW optimizer with an initial learning rate of  $1 \times 10^{-4}$ , and adopt a cosine learning rate scheduler with 500 warm-up steps. During dataset loading, the test set is configured to comprise 2% of the entire training dataset.

**Computational Resource.** We use PyTorch as our deep learning framework. All experiments are conducted on an NVIDIA A800 GPU, with approximately 75 GB of GPU memory consumption when training with a batch size of 200. The training process takes around 16 hours to complete 3000 epochs. However, checkpoints from earlier epochs can be selected for validation if desired.

We release two variants of our method: **SADP** and **SADP.G**. **SADP** is designed for *Garment-Environment-Interaction Tasks*, where the encoder incorporates the point cloud of environment-interaction objects. In contrast, **SADP.G** is tailored for *Garment-Self-Interaction Tasks*, where the encoder excludes the point cloud of environment-interaction objects. We provide detailed tutorials for both SADP and SADP.G in the released codebase to facilitate easy usage and integration.

## XII. LIMITATION

The manipulation of deformable objects (garments) is a highly challenging field. *DexGarmentLab* provides an initial environment, along with data collection and policy training methods, to facilitate advancements in this domain. However, we must acknowledge that *DexGarmentLab* still has several limitations, which will be analyzed in detail as follows.

### A. Garment Simulation Method Limitation

In *DexGarmentLab*, We employ Position-Based-Dynamics (PBD) and Finite-Element-Method (FEM) to simulate garment. However, both PBD and FEM have different limitations to accurately simulate the real-performance of fabric.

1) *Position-Based-Dynamics (PBD)*: In the simulator, garments modeled using Position-Based Dynamics (PBD) are represented as a collection of discrete particles, as shown in Fig. 6. This approach effectively captures the softness of fabric, facilitating operations such as folding and deformation. For this reason, we employ PBD to simulate larger and highly deformable garments, such as tops, trousers, dresses, etc.

However, since the particles are not tightly connected and contain numerous gaps (shown in Fig. 6), and self-collision interactions between particles can easily lead to instability in their states (This instability manifests as continuous jittering of the garment.), when manipulating the garment, penetration artifacts may occur, and maintaining a stable configuration can be challenging.

In *DexGarmentLab*, we designed a set of carefully tuned parameters for PBD simulation tailored to the provided assets, aiming to mitigate these issues. While some unrealistic garment behaviors may still persist, our approach enables a relatively reasonable approximation of garment performance.

2) *Finite-Element-Method (FEM)*: In the simulator, garments modeled using Finite Element Method (FEM) are represented as a collection of discrete blocks, as shown in Figure 6. This approach effectively simulates non-deformable and elastic objects but does not accurately capture garment deformations. When garments undergo deformation in the simulator, they tend to revert to their original shape easily, a phenomenon that is particularly pronounced for larger garments. As shown in Fig. 6, when garments modeled using FEM are dragged, the discrete blocks used for simulation remain tightly connected and do not separate. Besides, the garment tends to preserve its original shape throughout the dragging process.

In *DexGarmentLab*, we employ FEM to simulate garments such as gloves and hats, which do not exhibit significant deformations in the real world and typically maintain relatively stable shapes. Within the corresponding tasks, these garments demonstrate highly realistic physical properties.

### B. Environment Task Limitation

Although we propose 15 different tasks, including garment-self-interaction tasks and garment-environment-interaction tasks, these tasks all belong to single-garment tasks, while multi-garments tasks are not introduced.

What's more, in our simulation environment, we utilize two independent robotic arms equipped with dexterous hands (UR10e + ShadowHand). The tasks in our scenarios do not involve the movement of robotic system. However, for real-world household applications, a more suitable robotic platform would be a dual-arm mobile robot with a wheeled base. Nevertheless, our proposed method is applicable to various types of dual-arm robotic systems.

The aforementioned environment task limitations are fundamentally challenging issues in the field of deformable object manipulation and even in robotics as a whole. We look forward to future researchers building upon *DexGarmentLab* to continuously address these challenges and advance the development of deformable object manipulation.

### C. Generalizable Policy Limitation

Based on both simulation and real-world experimental results, we summarize the following points regarding policy limitation:

1. For garments with occluded or highly deformed regions, the Garment Affordance Model (GAM) does not always predict manipulation points accurately. This can lead to failed or suboptimal grasps by the dexterous hand, impacting the final performance. Nonetheless, GAM performs reliably on most garments. For challenging cases, an initial unfold action is recommended to expose key regions.

2. The policy struggles with garments that deviate from standard geometries, such as asymmetrical designs (e.g., single-sleeved tops) or heavily adorned costumes, which distort the point cloud and affect both GAM and SADP performance.

## XIII. DEXGARMENTLAB ASSETS

- **Garment Assets.** We select garments from ClothesNet [9], a large-scale dataset of 3D clothes objects with information-rich annotations. We select garments from 8 categories (including Tops, Dress, Trousers, Hat, Scarf, etc.) and use two physical simulation method (FEM and PBD) to simulate them.
- **Robots Assets.** The dual-arm robot used in *DexGarmentLab* consists of two ShadowHands mounted on UR10e robotic arms. Leveraging the URDF files provided by [2], we integrated the ShadowHand and UR10e URDFs and converted the combined URDF into a USD file using NVIDIA Isaac Sim. Users can customize the robot configuration through the provided URDF file to suit their specific tasks or simulation setups.
- **Environment-Interaction Assets.** The environment-interaction assets used in *DexGarmentLab* mainly includes: hanger, pothook, placement platform, human. The hanger, pothook and placement platform are created using basic components (for example, cube, capsule, etc.) supplied by Isaac Sim, while human model are obtained from *Omniverse Base Asset library*.
- **Material Assets.** Materials are crucial components of virtual relightable assets, defining the interaction of light



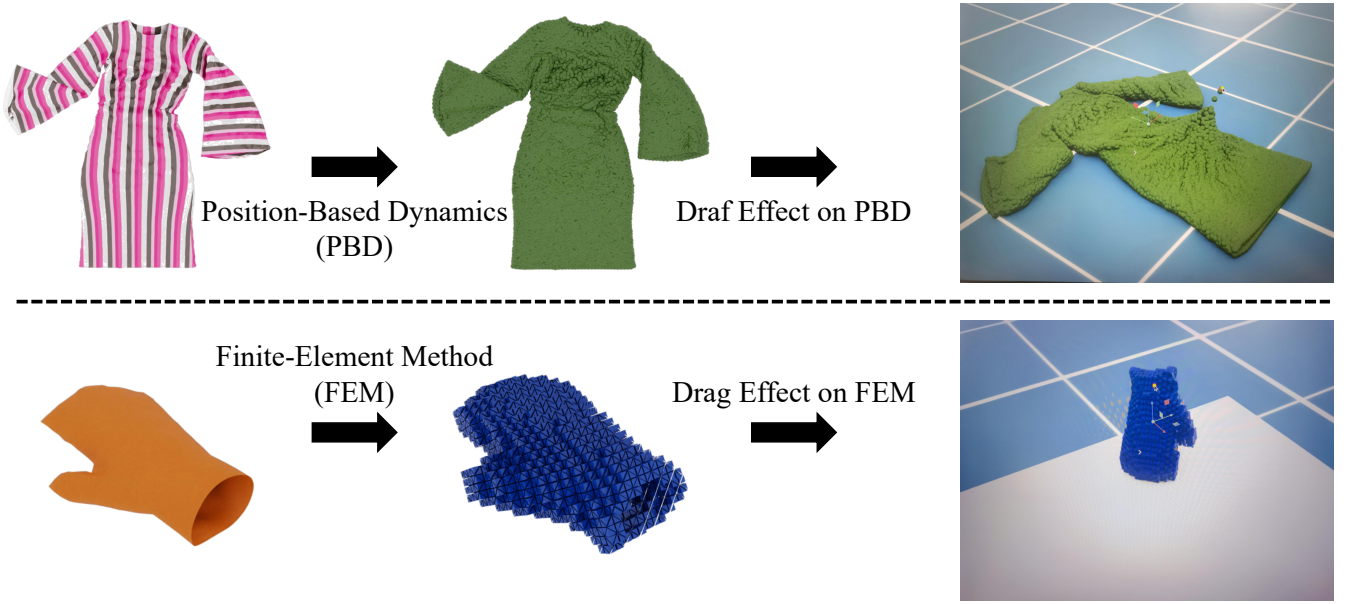

Fig. 6: Garment Simulation Method

at the surface of geometries. Our materials are primarily sourced from two repositories: a selection from *Omniverse Base Material Library* and additional assets obtained from <https://ambientcg.com/>. These materials are mainly used for simulating garments, grounds, and other scene elements.

#### XIV. DETAILED TASK DESCRIPTION

As we mentioned in the paper, we divide all the tasks into two categories: Garment-Self-Interaction Task and Garment-Environment-Interaction Task.

Garment-Self-Interaction Tasks include:

**Fold Tops** (Sec. XIV-A), **Fold Dress** (Sec. XIV-B), **Fold Trousers** (Sec. XIV-C), **Fling Tops** (Sec. XIV-D), **Fling Dress** (Sec. XIV-E), **Fling Trousers** (Sec. XIV-F).

Garment-Environment-Interaction Tasks include:

**Hang Coat** (Sec. XIV-G), **Hang Tops** (Sec. XIV-H), **Hang Dress** (Sec. XIV-I), **Hang Trousers** (Sec. XIV-J), **Store Tops** (Sec. XIV-K), **Wear Baseball Cap** (Sec. XIV-L), **Wear Bowl Hat** (Sec. XIV-M), **Wear Scarf** (Sec. XIV-N), **Wear Glove** (Sec. XIV-O).

In this section, we will provide a detailed description of each selected task, covering *task initialization and randomization*, *task sequences*, *task success metrics*, *garment assets for task* and other related aspects. These details will be introduced in separate subsections for clarity.

##### A. Fold Tops

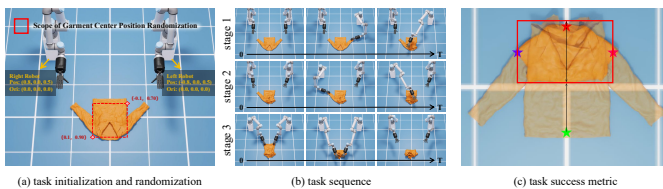

Fig. 7: Fold Tops Task.

1) *Task Initialization and Randomization*: Task Configuration is shown in Fig. 7 (a).

As for initialization, the garment is initialized in a flat state, which means that the initial orientation of the garment is set to (0.0, 0.0, 0.0). The positions of the left and right robots are set to (-0.8, 0.0, 0.5) and (0.8, 0.0, 0.5) respectively, with both orientations initialized to (0.0, 0.0, 0.0).

During data collection and policy evaluation, we randomly selected the position of the garment within a certain range. For this task, the initial position of the tops is randomized within a rectangular area defined by  $-0.10 < x < 0.10$  and  $0.70 < y < 0.90$ .

It should be noted that the randomization range for the position refers to the location of garment's center, and the unit distance is 1 meter. Additionally, the initial orientation is set as euler angles. All descriptions in the following sections follow this convention.

2) *Task Sequence*: As shown in Fig. 7 (b), the sequence of *Fold Tops* consists of three stages. First, fold the left sleeve to the right, then fold the right sleeve to the left, and finally grab the corners of the garment and fold them upward to complete the fold.

3) *Task Success Metrics*: The garment is initially in a flat state. First, Garment Affordance Model (GAM) is used to locate four key points: the left and right sleeve points, as well as the collar and bottom of the garment. Then, the left and right boundaries are determined by the points on the left and right sleeves, and the central boundary is determined by the points on the collar and bottom. The collar and center are then used as the upper and lower boundaries, respectively, forming a rectangular area, as shown in Fig. 7 (c). The success of the fold is determined by checking whether the final state lies within this area. If the garment region within the area covers more than 85% of the total garment area, the 'fold' manipulation is considered successful. To ensure

data validity, images of the final state were also recorded and manually checked.

4) *Garment Assets for Task*: For this task, the garments used are long-sleeved tops, a total of **247** pieces. During data collection, we first selected 100 garments and then randomly chose from these 100 garments for data collection. During policy randomization, we randomly select from all 247 garments to ensure that the validation set contains data that was not seen during training.

### B. Fold Dress

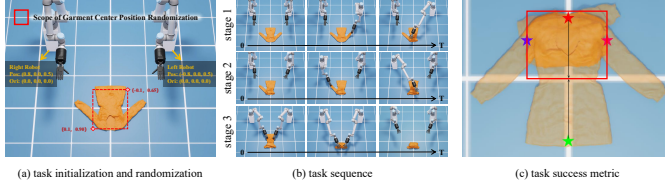

Fig. 8: Fold Dress Task.

1) *Task Initialization and Randomization*: Task Configuration is shown in Fig. 8 (a).

The initialization configuration of Fold Dress task is the same with those of Fold Tops. As for randomization, the initial position of the dress is randomized within a rectangular area defined by  $-0.10 < x < 0.10$  and  $0.65 < y < 0.90$ .

2) *Task Sequence*: As shown in Fig. 8 (b), the sequence of *Fold Dress* also consists of three stages. First, fold the left sleeve to the right, then fold the right sleeve to the left, and finally, since a dress is usually longer, we choose to grab the waist of the dress (instead of the skirt hem) and fold it upward.

3) *Task Success Metrics*: The success criteria for this task are the same as for Tops. Four points are selected to form a rectangular area, as shown in Fig. 8 (c), and the folded garment is checked to see if it lies within this area. If the garment region within the area covers more than 80% of the total garment area, the 'fold' manipulation is considered successful.

4) *Garment Assets for Task*: The garments used in this task are long-sleeved dresses, with a total of **38** pieces. During data collection, we first randomly select 18 dresses and then randomly choose from these 26 for data collection. In the validation experiments, dresses are randomly selected from all 38 pieces for the validation process.

### C. Fold Trousers

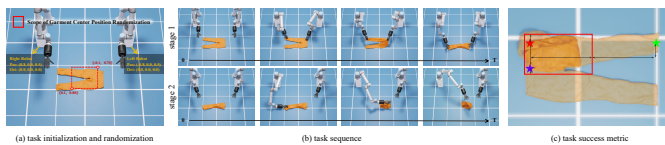

Fig. 9: Fold Trousers Task.

1) *Task Initialization and Randomization*: Task Configuration is shown in Fig. 9 (a).

For the initialization of Fold Trousers, the trousers need to be laid horizontally on the ground, so the orientation of the garment is set to (0.0, 0.0, 90.0). As for randomization, the initial position of the trousers is randomized within a rectangular area defined by  $-0.10 < x < 0.10$  and  $0.70 < y < 0.90$ .

2) *Task Sequence*: The sequence of *Fold Trousers* consists of two stages, as shown in Fig. 9 (b). First, fold the trousers along the center axis, then fold the pant legs towards the waistband to complete the task.

3) *Task Success Metrics*: Similar to the previous two folding tasks, three points are selected, as shown in Fig. 9 (c). The boundaries of the folded garment are calculated based on the positions of these three points, and the success of the task is determined by checking whether the folded garment lies within this area. If the garment region within the area covers more than 85% of the total garment area, the 'fold' manipulation is considered successful.

4) *Garment Assets for Task*: The Fold Trousers task uses a total of **317** trousers. During data collection, 100 pieces are randomly selected from the 317, and then randomly chosen from these 100 for data collection. In validation experiments, garments are randomly selected from all 317 pieces for validation.

### D. Fling Tops

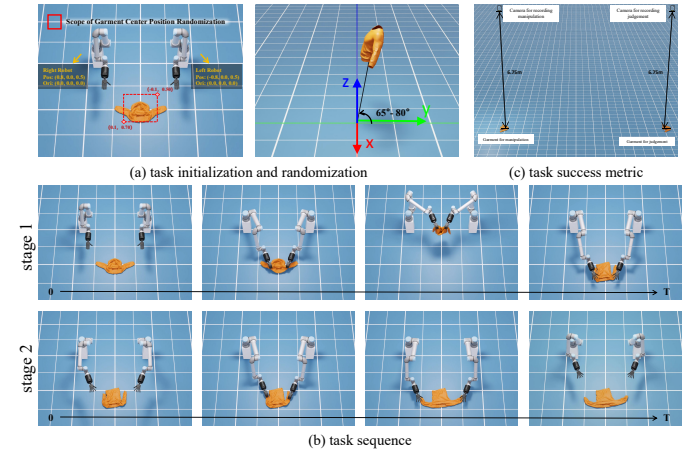

Fig. 10: Fling Tops Task.

1) *Task Initialization and Randomization*: Task Configuration is shown in Fig. 10 (a).

For the Fling task, the garment should initially be in a wrinkled state. Therefore, an inclination angle and a certain height are given at the start to ensure that the garment lands in a stacked state. For this task, the inclination angle is set to 65-80 degrees, i.e., the initial orientation is (65.0-80.0, 0.0, 0.0), as shown in Fig. 10 (a).

As for position randomization, the initial position of the tops is randomized within a rectangular area defined by  $-0.10 < x < 0.10$  and  $0.50 < y < 0.70$ .

2) *Task Sequence*: As shown in Fig. 10 (b), the *Fling Tops* task consists of two stages. First, grab the shoulders of the top, lift it up, and extend hands forward and downward



to flatten the body part of the top. Then, grab both sleeves and pull them outward to flatten the sleeves.

3) *Task Success Metrics*: For the Fling task, we use an area-based judgment method. A matching garment is placed in a different location in the environment in a flat, non-tilted state. In the final judgment, images are captured by cameras positioned at the same height directly above both the Fling garment and the garment used for comparison, as shown in Fig. 10 (c). Then, the proportion of the area occupied by the garments in the images is calculated. If the difference in area proportions is smaller than a certain threshold (here we set 0.2), it indicates that the area of the Fling garment is close to that of the flat garment, and the Fling is considered successful.

4) *Garment Assets for Task*: The assets and partitioning method used in this task are the same as those in the Fold Tops task mentioned earlier.

### E. Fling Dress

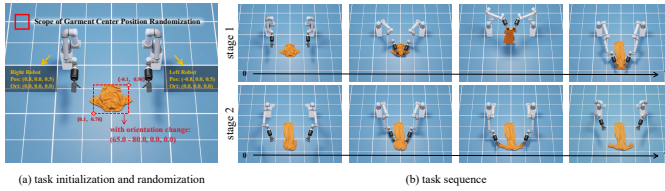

Fig. 11: **Fling Dress Task.**

1) *Task Initialization and Randomization*: Task Configuration is shown in Fig. 11 (a).

In this task, the orientation randomization of the dress is also set to (65.0-80.0, 0.0, 0.0). As for position randomization, the initial position of the dress is randomized within the range  $-0.10 < x < 0.10$  and  $0.50 < y < 0.70$ .

2) *Task Sequence*: The sequence of *Fling Dress* is essentially the same as that of *Fling Tops*, as shown in Fig. 11 (b).

3) *Task Success Metrics*: The same area-based judgment method as described in the *Fling Tops* task is also applied in this task.

4) *Garment Assets for Task*: The assets and partitioning method used in this task are the same as those in the *Fold Dress* task mentioned earlier.

### F. Fling Trousers

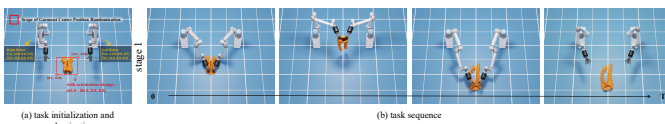

Fig. 12: **Fling Trousers Task.**

1) *Task Initialization and Randomization*: Task Configuration is shown in Fig. 12 (a).

In this task, the orientation randomization of the trousers is also set to (65.0-80.0, 0.0, 0.0). As for position randomization, the initial position of the trousers is randomized within the range  $-0.10 < x < 0.10$  and  $0.50 < y < 0.70$ .

2) *Task Sequence*: The *Fling Trousers* task consists of only one stage: grab the waistband and lift it up, then extend hands forward and downward to flatten the trousers, as shown in Fig. 12 (b).

3) *Task Success Metrics*: The assets and partitioning method used in this task are the same as those in the *Fold Trousers* task mentioned earlier.

4) *Garment Assets for Task*: The same area-based judgment method as described in the *Fling Tops* task is also applied in this task.

### G. Hang Coat

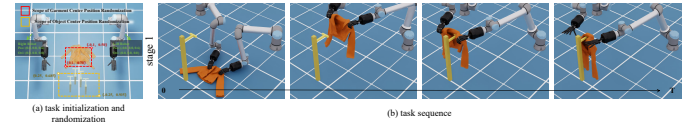

Fig. 13: **Hang Coat Task.**

1) *Task Initialization and Randomization*: Task Configuration is shown in Fig. 13 (a).

This task involves randomization not only in the position of garments but also in the position of environment-interaction objects. The initial position of the coats is randomized within the range  $-0.10 < x < 0.10$  and  $0.50 < y < 0.70$ . The initial position of the pothook is randomized within the range  $-0.25 < x < 0.25$  and  $0.685 < y < 0.935$ .

2) *Task Sequence*: The *Hang Coat* task consists of one stage: grab the coat's lapels and lift the garment up to the pothook, as shown in Fig. 12 (b). The lifting height and placement position vary depending on the shape of the garment and the location of the pothook.

3) *Task Success Metrics*: The ideal final state of this task is that the garment is stably hung on the pothook without falling off. Therefore, we determine task success based on the center position of the garment. Specifically, if the z-coordinate of the garment's center is greater than 0.5 (to exclude cases where it has fallen to the ground) and less than 2.0 (to exclude abnormal simulation states), the task is considered successful.

4) *Garment Assets for Task*: The garments used in the *Open Coats* task are front opening tops, with a total of 78 garments. During data collection, 40 pieces of the garments are randomly selected, and then a random subset of these 40 garments is chosen for data collection. In the validation experiments, garments are randomly selected from all 78 pieces for validation.

### H. Hang Tops

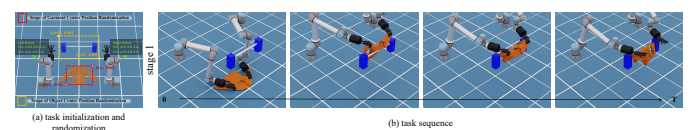

Fig. 14: **Hang Tops Task.**

1) *Task Initialization and Randomization*: Task Configuration is shown in Fig. 14 (a).

This task involves randomization not only in the position of garments but also in the position of environment-interaction objects. The initial position of the tops is randomized within the range  $-0.10 < x < 0.10$  and  $0.50 < y < 0.80$ . The initial position of the hanger is randomized within the range  $-0.15 < x < 0.15$  and  $0.80 < y < 0.90$ .

2) *Task Sequence*: The sequence of *Hang Tops* is shown in Figure 14 (b). First, grab the shoulders of the top and lift the garment, then move it forward to drape the top over the hanger. The lifting height and placement position vary depending on the shape of the garment and the location of the hanger.

3) *Task Success Metrics*: For the Hang task, the garment should ultimately be hanging on the hanger, with all parts of the garment above a certain height. Therefore, we determine the success of the Hang task by checking whether all points of the garment's point cloud are above this height. Additionally, we also check whether the distance between the center of the garment and the center of the hanger falls within a certain range, in order to exclude cases where the garment is not hung near the central region of the rack.

4) *Garment Assets for Task*: The assets and partitioning method used in this task are the same as those in the Fold Tops task mentioned earlier.

## I. Hang Dress

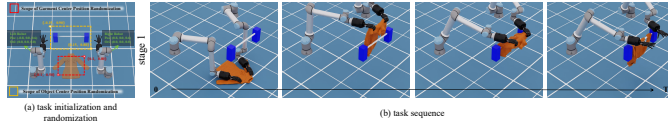

Fig. 15: Hang Dress Task.

1) *Task Initialization and Randomization*: Task Configuration is shown in Fig. 15 (a).

This task involves randomization not only in the position of garments but also in the position of environment-interaction objects. The initial position of the dress is randomized within the range  $-0.10 < x < 0.10$  and  $0.50 < y < 0.80$ . The initial position of the hanger is randomized within the range  $-0.15 < x < 0.15$  and  $0.80 < y < 0.90$ .

2) *Task Sequence*: The sequence of *Hang Dress* is the same as that of Hang Tops, as shown in Figure 15 (b). The lifting height and placement position vary depending on the shape of the garment and the location of the hanger.

3) *Task Success Metrics*: The metric for Hang Dress is the same as that for Hang Tops.

4) *Garment Assets for Task*: The assets and partitioning method used in this task are the same as those in the Fold Dress task mentioned earlier.

## J. Hang Trousers

1) *Task Initialization and Randomization*: Task Configuration is shown in Fig. 16 (a).

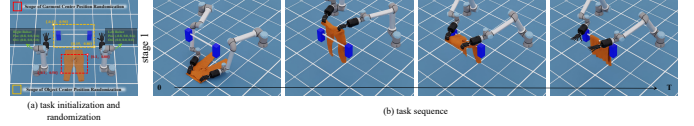

Fig. 16: Hang Trousers Task.

This task involves randomization not only in the position of garments but also in the position of environment-interaction objects. The initial position of the dress is randomized within the range  $-0.10 < x < 0.10$  and  $0.50 < y < 0.80$ . The initial position of the hanger is randomized within the range  $-0.15 < x < 0.15$  and  $0.80 < y < 0.90$ .

2) *Task Sequence*: The process of Hang Trousers is shown in Fig. 16 (b). Grab the waistband and then follow the same steps as for Hang Tops and Dress. The lifting height and placement position vary depending on the shape of the garment and the location of the hanger.

3) *Task Success Metrics*: The metric for Hang Trousers is the same as that for Hang Tops.

4) *Garment Assets for Task*: The assets and partitioning method used in this task are the same as those in the Fold Trousers task mentioned earlier.

## K. Store Tops

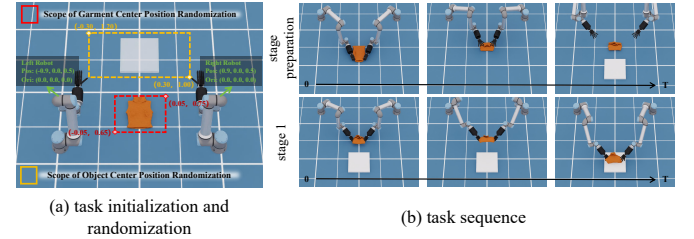

Fig. 17: Store Tops Task.

1) *Task Initialization and Randomization*: Task Configuration is shown in Fig. 17 (a).

This task involves randomization not only in the position of garments but also in the position of environment-interaction objects. The initial position of the tops is randomized within the range  $-0.05 < x < 0.05$  and  $0.65 < y < 0.75$ . The initial position of the placement platform is randomized within the range  $-0.30 < x < 0.30$  and  $1.00 < y < 1.20$ .

2) *Task Sequence*: The sequence of *Store Tops* is divided into stage\_preparation and stage\_1, as shown in Figure 17 (b). In stage\_preparation, grab the shoulders and fold the garment towards the corners in order to make garment ready. Then in stage 1, use both hands to grab the corners and place the garment in the corner of placement platform.

3) *Task Success Metrics*: The goal of this task is to place the folded garment at the exact center of the placement platform. Therefore, after the task is completed, we load a camera above the garment to capture a point cloud of its final state. The center position of the garment is then computed from the point cloud coordinates and compared with the center position of the placement platform, which is accessible in the simulator. If the distance between the two

centers is smaller than a predefined threshold (set to 0.1 in this case), the task is considered successful.

4) *Garment Assets for Task*: The garments used for the Store task are sleeveless tops, with a total of **217** pieces. During data collection, 100 pieces are randomly selected from these 217 garments. In validation experiments, garments are randomly selected from all 217 pieces.

#### L. Wear Baseball Cap

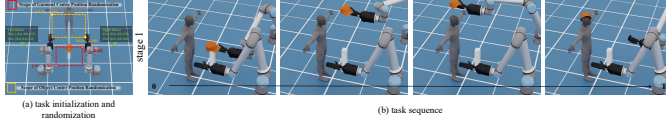

Fig. 18: Wear Baseball Cap Task.

1) *Task Initialization and Randomization*: Task Configuration is shown in Fig. 18 (a).

This task involves randomization not only in the position of garments but also in the position of environment-interaction objects. The initial position of the baseball cap is randomized within the range  $-0.10 < x < 0.10$  and  $0.70 < y < 0.90$ . The initial position of the human is randomized within the range  $-0.15 < x < 0.15$  and  $1.10 < y < 1.20$ .

2) *Task Sequence*: The sequence of *Wear Baseball Cap* is shown in Figure 18 (b). First, use the right hand to grab the brim of the cap, then position the cap and place it on the top of the head. The lifting height and placement position vary depending on the shape of the garment and the location of the human.

3) *Task Success Metrics*: The final goal of wearing the cap is for it to be placed on top of the head. Therefore, the success criterion is based on whether the distance between the final center of the cap and the top of the head is within a certain threshold.

4) *Garment Assets for Task*: There are **12** baseball caps in total. During data collection and policy validation, we all use 12 pieces of caps for random selection.

#### M. Wear Bowl Hat

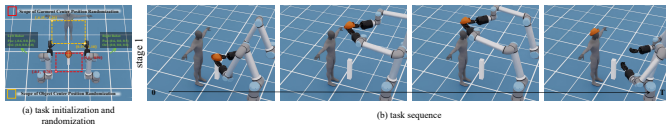

Fig. 19: Wear Bowl Hat Task.

1) *Task Initialization and Randomization*: Task Configuration is shown in Fig. 19 (a).

This task involves randomization not only in the position of garments but also in the position of environment-interaction objects. The initial position of the bowl hat is randomized within the range  $-0.10 < x < 0.10$  and  $0.70 < y < 0.90$ . The initial position of the human is randomized within the range  $-0.15 < x < 0.15$  and  $1.10 < y < 1.20$ .

2) *Task Sequence*: The sequence of *Wear Bowl Hat* is done with both hands. First, use both hands to grab the left and right sides of the hat from below, then align it with the head, and gently place it on the head. The entire process is shown in Figure 19 (b). The lifting height and placement position vary depending on the shape of the garment and the location of the human.

3) *Task Success Metrics*: The same as the criterion for wearing baseball cap.

4) *Garment Assets for Task*: There are **8** bowl hats in total. During data collection and policy validation, we all use 8 pieces of hat for random selection.

#### N. Wear Scarf

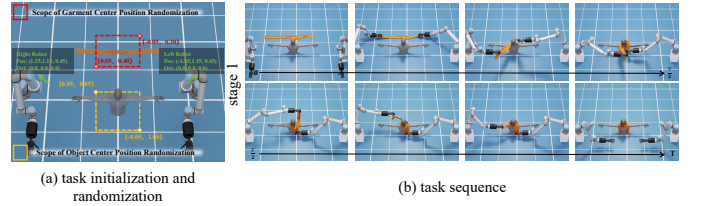

Fig. 20: Wear Scarf Task.

1) *Task Initialization and Randomization*: Task Configuration is shown in Fig. 20 (a).

This task involves randomization not only in the position of garments but also in the position of environment-interaction objects. The initial position of the scarf is randomized within the range  $-0.05 < x < 0.05$  and  $0.30 < y < 0.40$ . The initial position of the human is randomized within the range  $-0.05 < x < 0.05$  and  $0.85 < y < 1.00$ .

2) *Task Sequence*: The sequence of *Wear Scarf* is shown in Figure 20 (b). First, grab both ends of the scarf and drape it around the neck. Then, use the right hand to grab the right end and wrap it around the neck to complete the task. The manipulation position and placement position vary depending on the shape of the garment and the location of the human.

3) *Task Success Metrics*: For the scarf-wearing task, if the scarf is not successfully placed around the person's neck, it will droop to the ground. To detect this, we place a camera in front of and behind the human model to capture point clouds of the scarf. If the number of points below a certain height threshold (set to 0.2 meters) exceeds a predefined count threshold (set to 20) in both front and rear point clouds, we consider the scarf to be drooping on the ground and thus regard the task as a failure. Otherwise, the task is considered successful.

4) *Garment Assets for Task*: We use 8 types of scarf for data collection and randomization, which have different length (0.35m, 0.36m, 0.37m, 0.38m, 0.39m, 0.40m, 0.41m, 0.42m, respectively).

#### O. Wear Glove

The sequence of the *Wear Gloves* task is shown in Figure 21. First, use the index fingers of both hands to insert



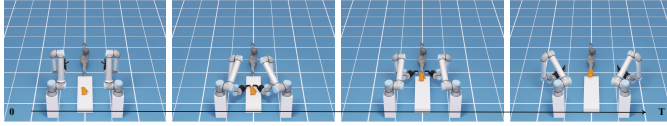

Fig. 21: **Wear Glove Task.**

into the gloves and pull them apart. Then, move the gloves forward and put them on the hands.

Due to the small size of the glove and the requirement for precise insertion of the index finger, followed by pinching with the thumb to grasp the side of the glove, achieving this effect is challenging with the current FEM simulation and dexterous hand manipulation. Therefore, we employed the *attachment block* method to accomplish the wear gloves task, and did not implement randomization of the initial position for this task, nor did we validate it through policy evaluation. We look forward to future work enabling dexterous hands to better handle such extremely fine-grained tasks.

#### P. Additional Explanation for Success Metric

Although we have designed specific success metrics for each task, and our validation shows that these metrics can reliably determine task success or failure in most cases, the inherently complex nature of garment states makes it difficult to judge success purely based on the final state in certain situations. Therefore, during both data collection and policy validation, we record the final state of the garment as well as a full video of each episode. During data collection, users can review the final state images to identify potentially abnormal episodes and use the corresponding videos to decide whether to keep the data. Similarly, during policy validation, users can apply the same approach to avoid misjudgments in result evaluation.

## XV. BROADER IMPACT

Our work presents a dexterous garment manipulation environment, with a particular focus on coordinated dual-arm dexterous hands. This effort advances the field of deformable object manipulation and lays a solid foundation—both in simulation and algorithmic development—for future progress in general-purpose home-assistant robotics involving deformable object handling. We haven’t observed negative potential impacts.

## REFERENCES

- [1] Cheng Chi, Zhenjia Xu, Siyuan Feng, Eric Cousineau, Yilun Du, Benjamin Burchfiel, Russ Tedrake, and Shuran Song. Diffusion policy: Visuomotor policy learning via action diffusion. *The International Journal of Robotics Research*, page 02783649241273668, 2023.
- [2] Runyu Ding, Yuzhe Qin, Jiyue Zhu, Chengzhe Jia, Shiqi Yang, Ruihan Yang, Xiaojuan Qi, and Xiaolong Wang. Bunny-visionpro: Real-time bimanual dexterous teleoperation for imitation learning. *arXiv preprint arXiv:2407.03162*, 2024.
- [3] Cheng-I Lai. Contrastive predictive coding based feature for automatic speaker verification. *arXiv preprint arXiv:1904.01575*, 2019.
- [4] Charles Ruizhongtai Qi, Li Yi, Hao Su, and Leonidas J Guibas. Pointnet++: Deep hierarchical feature learning on point sets in a metric space. *Advances in neural information processing systems*, 30, 2017.

- [5] Nikhila Ravi, Valentin Gabeur, Yuan-Ting Hu, Ronghang Hu, Chaitanya Ryali, Tengyu Ma, Haitham Khedr, Roman Rädle, Chloe Rolland, Laura Gustafson, Eric Mintun, Junting Pan, Kalyan Vasudev Alwala, Nicolas Carion, Chao-Yuan Wu, Ross Girshick, Piotr Dollár, and Christoph Feichtenhofer. Sam 2: Segment anything in images and videos, 2024.
- [6] Ruoxi Shi, Zhengrong Xue, Yang You, and Cewu Lu. Skeleton merger: an unsupervised aligned keypoint detector. In *Proceedings of the IEEE/CVF conference on computer vision and pattern recognition*, pages 43–52, 2021.
- [7] Ruihai Wu, Haoran Lu, Yiyan Wang, Yubo Wang, and Hao Dong. Unigarmentmanip: A unified framework for category-level garment manipulation via dense visual correspondence. In *Proceedings of the IEEE/CVF Conference on Computer Vision and Pattern Recognition*, pages 16340–16350, 2024.
- [8] Yanjie Ze, Gu Zhang, Kangning Zhang, Chenyuan Hu, Muhan Wang, and Huazhe Xu. 3d diffusion policy. *arXiv preprint arXiv:2403.03954*, 2024.
- [9] Bingyang Zhou, Haoyu Zhou, Tianhai Liang, Qiaojun Yu, Siheng Zhao, Yuwei Zeng, Jun Lv, Siyuan Luo, Qiancai Wang, Xinyuan Yu, Haonan Chen, Cewu Lu, and Lin Shao. Clothesnet: An information-rich 3d garment model repository with simulated clothes environment, 2023.
